# Supplementary material
Source: publisher site journal article supplement (https://neobiota.pensoft.net/article/23398/download/suppl/37/)
Supplement: Supplementary file 1

Supplementary File 7. Deterministic population models per reference data set

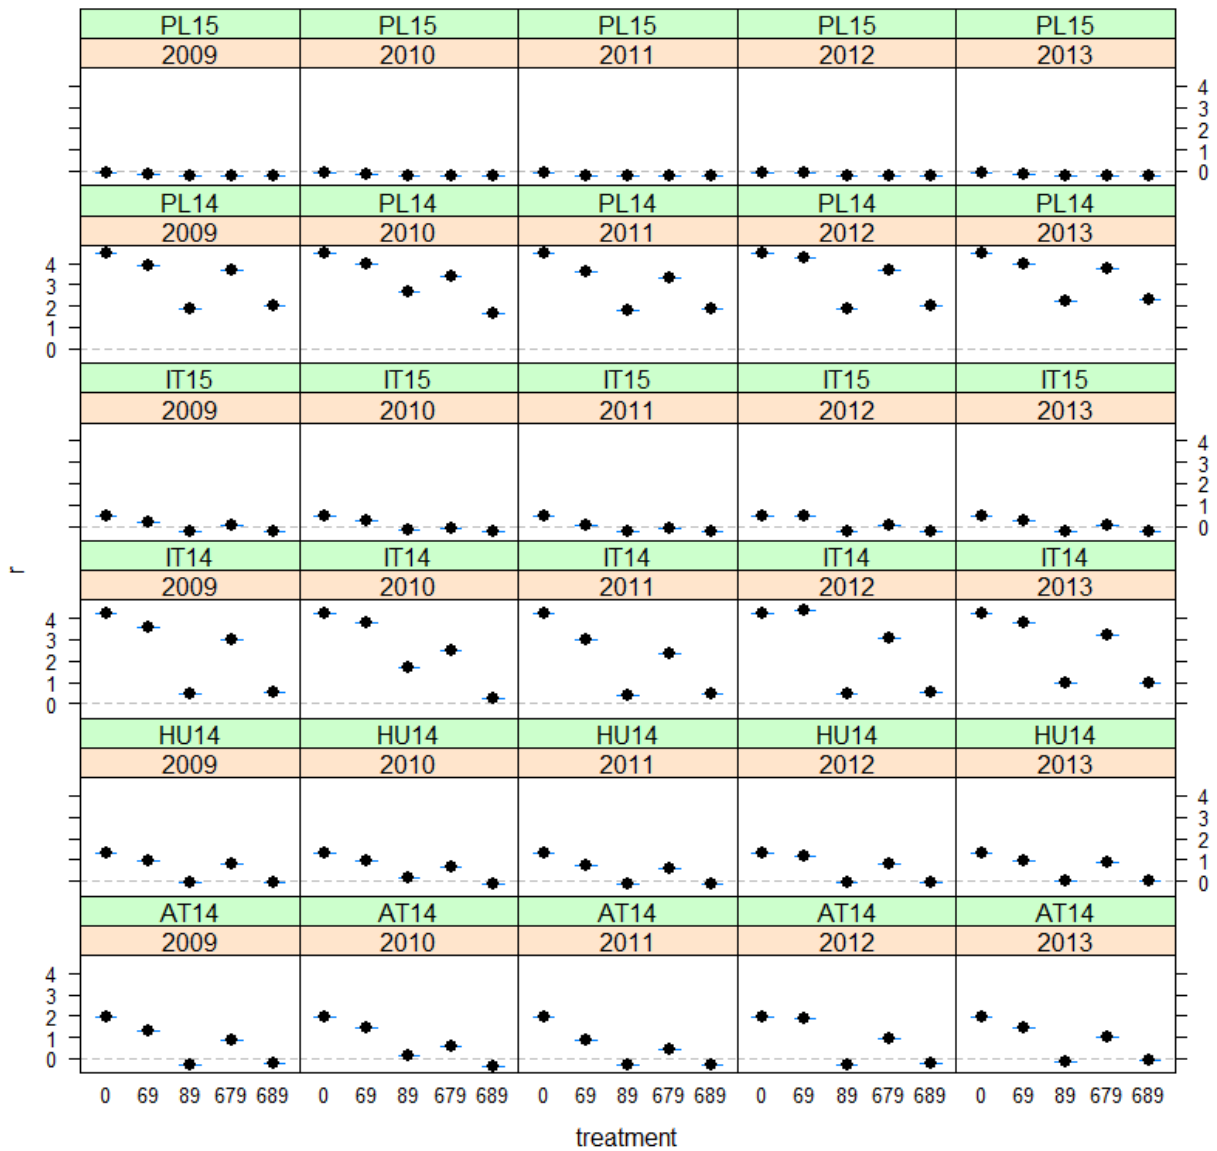

Fig. S12. Intrinsic population growth rates  $r$  per reference data set for each year for seed survival scenario H, dotted line represents population replacement level.

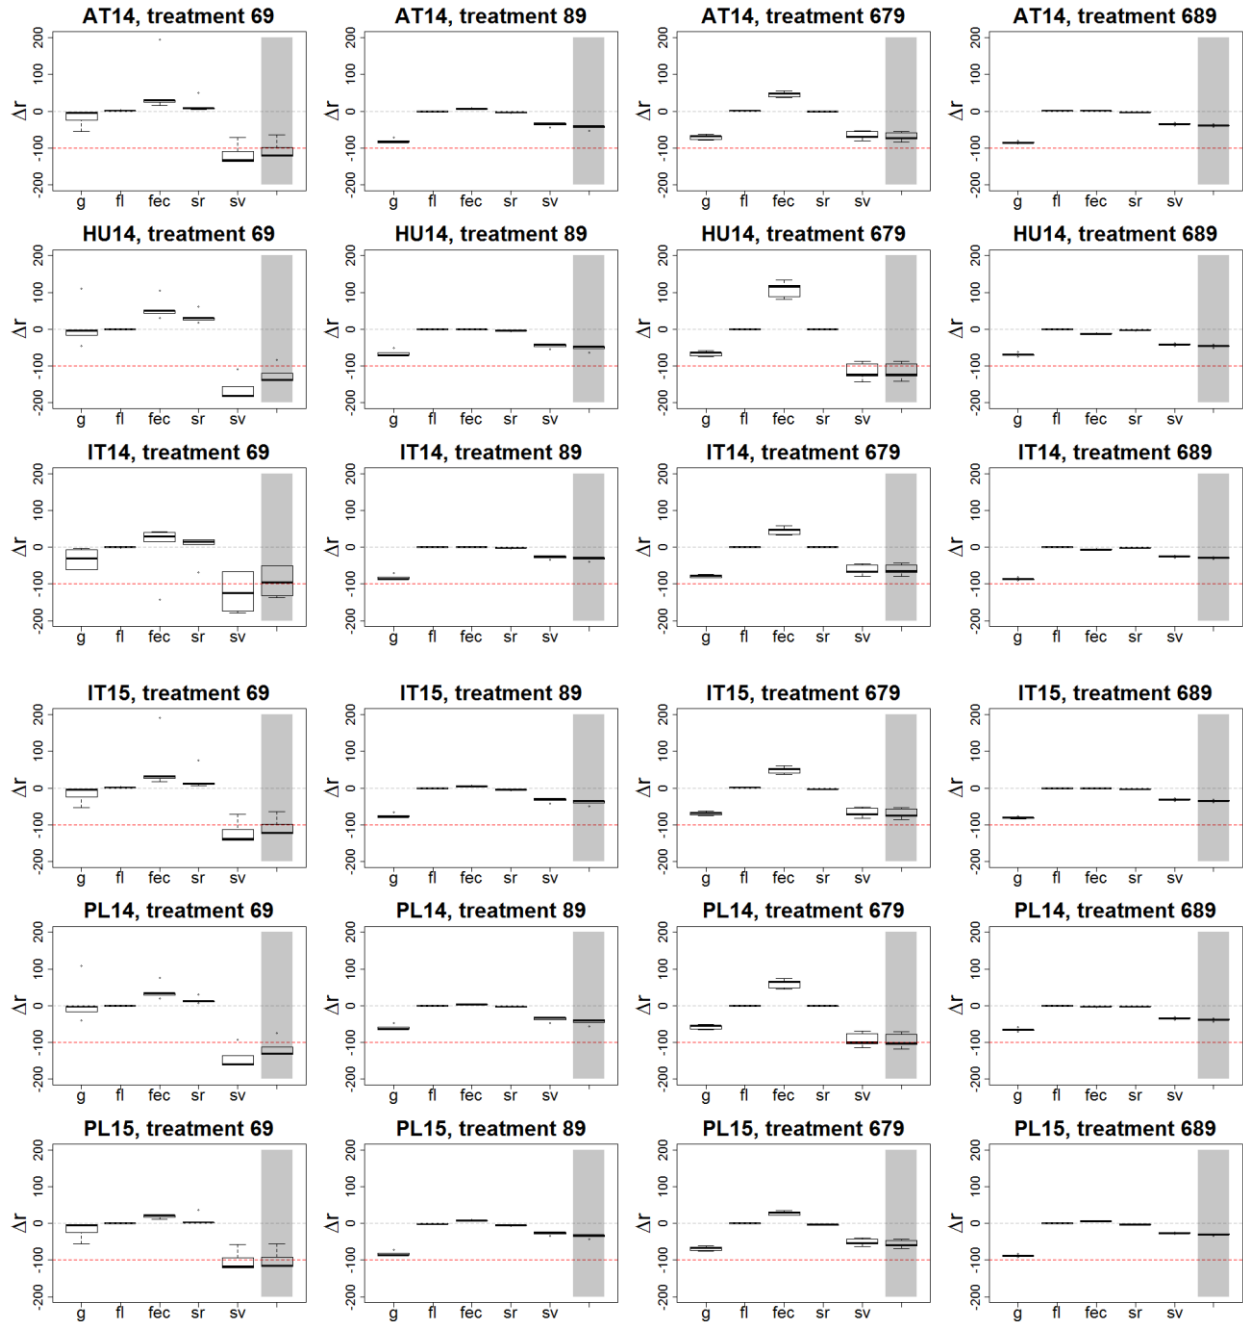

Fig. S13. Relative contribution of vital rates (g=growth, fl=flowering, fec=fecundity, sr=seed ripening, sv=seed viability) and the cut in September (Sept) to change in population growth  $r$  ( $\Delta r$ ) per reference data set (rows) and treatment (panels) for seed scenario H. The y-axis represents the percentage change in  $r$  compared to the untreated reference, relative to the total change due to the mowing treatment (red dashed line at -100%). Boxplots represent variation across years (N=5).
